# Supplementary material
Source: publisher figshare collection journal article supplement (https://acs.figshare.com/ndownloader/files/3802774)
Supplement: Supplementary file 1 [file 3802774]

Supplementary information for:

# Enhancement of the Fill Factor through an Increase of the Crystallinity in Fullerene-Based Small-Molecule Organic Photovoltaic Cells

*Min-Soo Choi<sup>†</sup>, Tae-Min Kim<sup>†</sup>, Hyun-Sub Shim<sup>†</sup>, Beom-Soo Kim<sup>†</sup>, Hyo Jung Kim<sup>‡</sup>, and Jang-*

*Joo Kim<sup>\*†</sup>*

<sup>†</sup>Department of Materials Science and Engineering, Seoul National University, Seoul 151-744,  
South Korea

<sup>‡</sup>Department of Organic Material Science and Engineering, College of Engineering, Pusan  
National University, Busan 609-735, South Korea

Corresponding author email: [jjkim@snu.ac.kr](mailto:jjkim@snu.ac.kr)

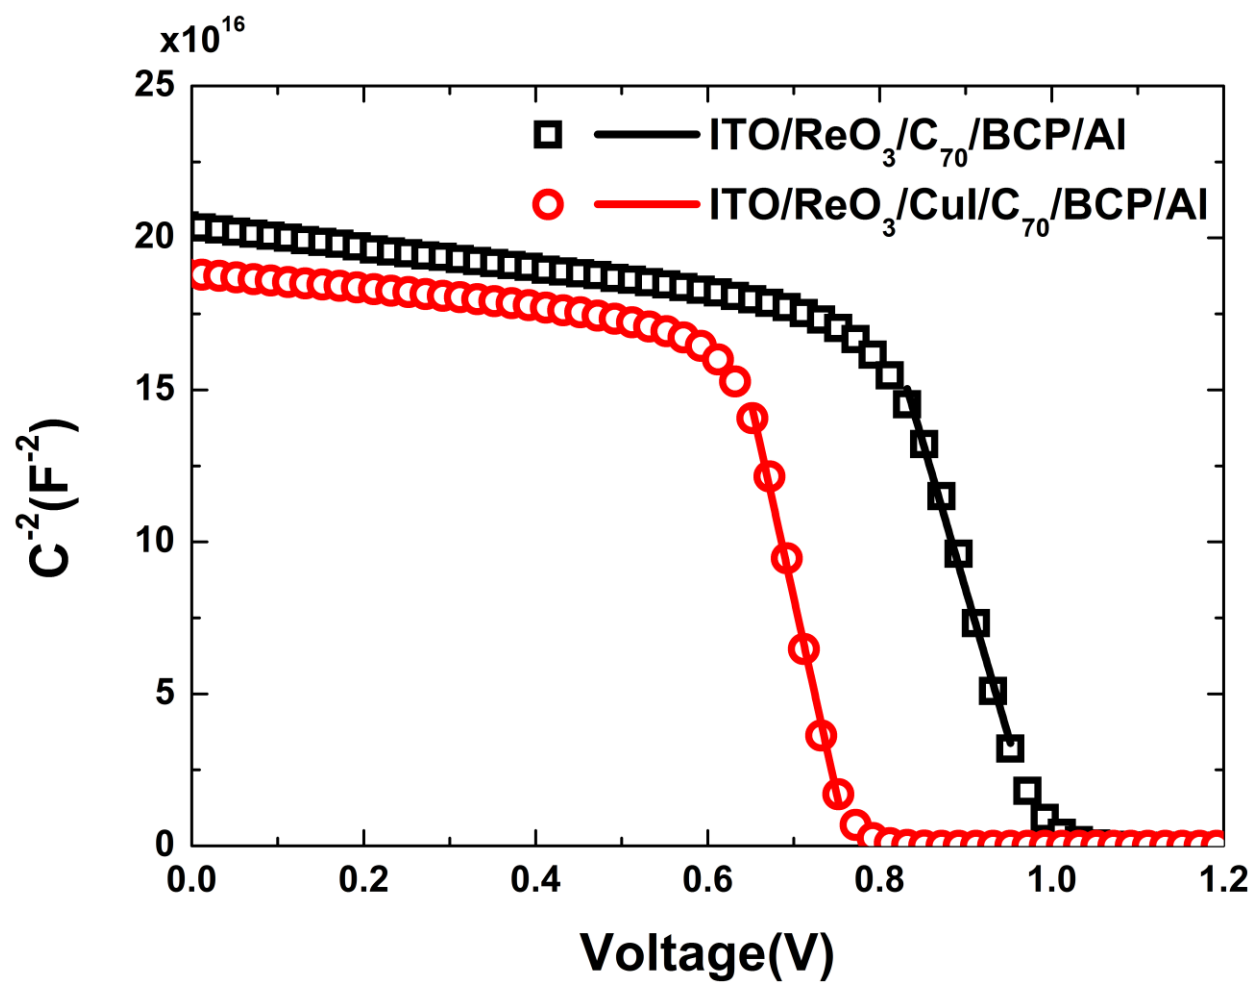

Figure S1. Capacitance-voltage characteristics of Schottky solar cells. Solid lines represent Mott-Schottky plot.

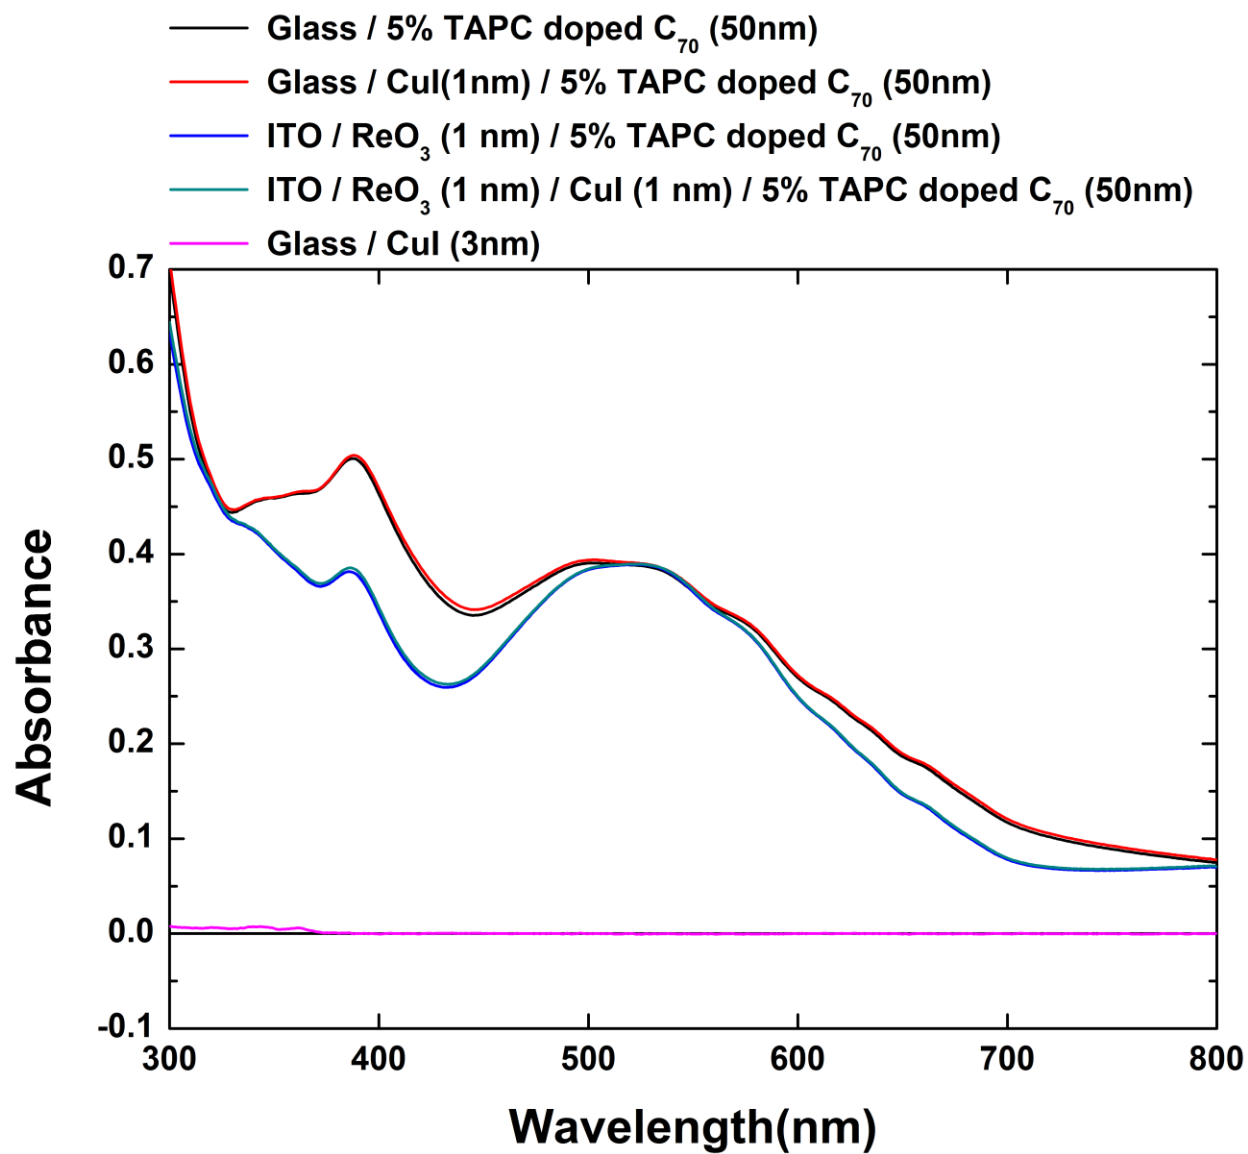

Figure S2. Absorption spectra of organic films. It is shown that optical properties of fullerene films remain with inserting CuI templating layer.

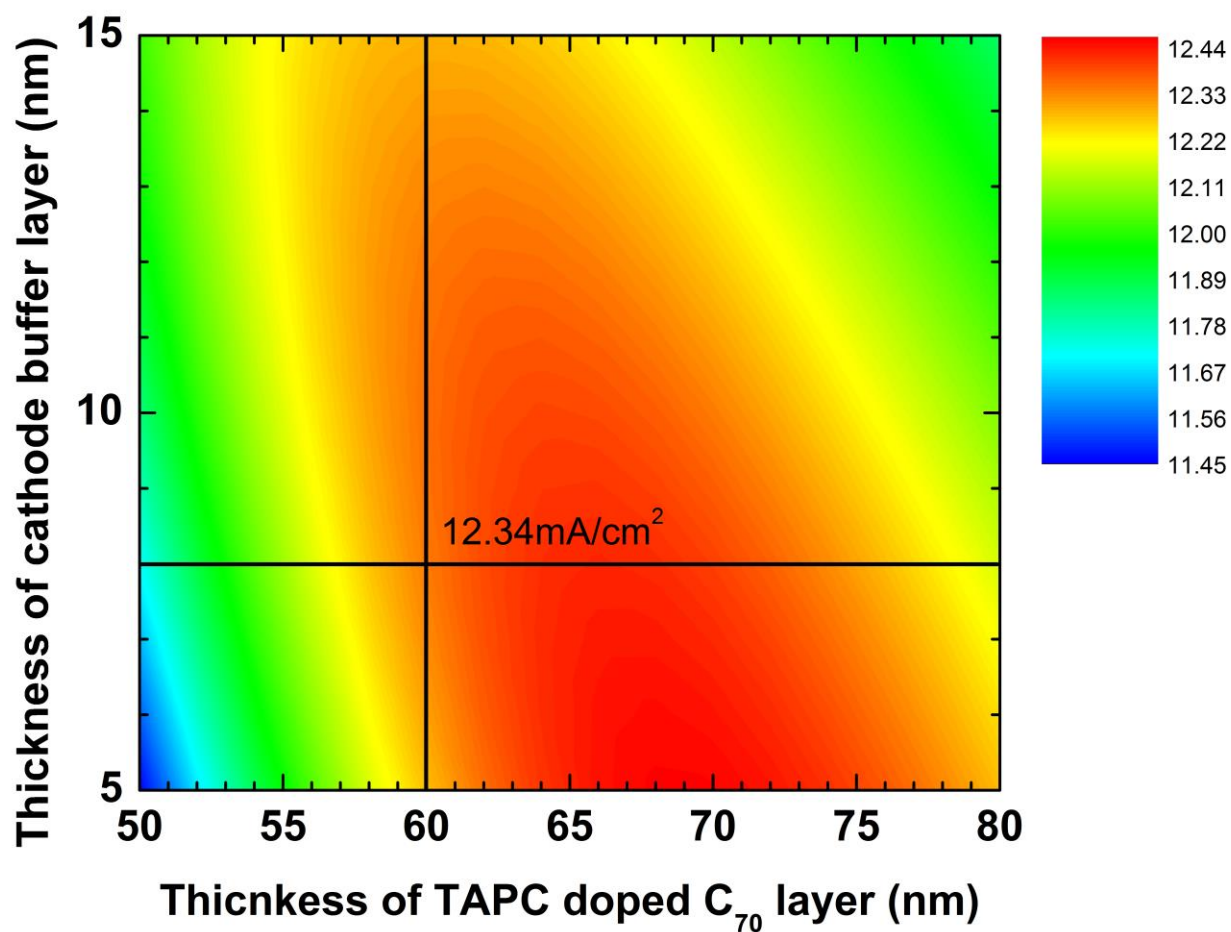

Figure S3. Calculated  $J_{SC}$  of ITO/5% TAPC doped  $C_{70}$ /BCP (cathode buffer layer)/Al (100 nm) by transfer matrix method. The 1 nm thick hole extraction layer can be negligible because the calculated  $J_{SC}$  with and without 1 nm thick  $\text{ReO}_3$  are  $12.61 \text{ mA/cm}^2$  and  $12.34 \text{ mA/cm}^2$  respectively and an error is less than 2%.

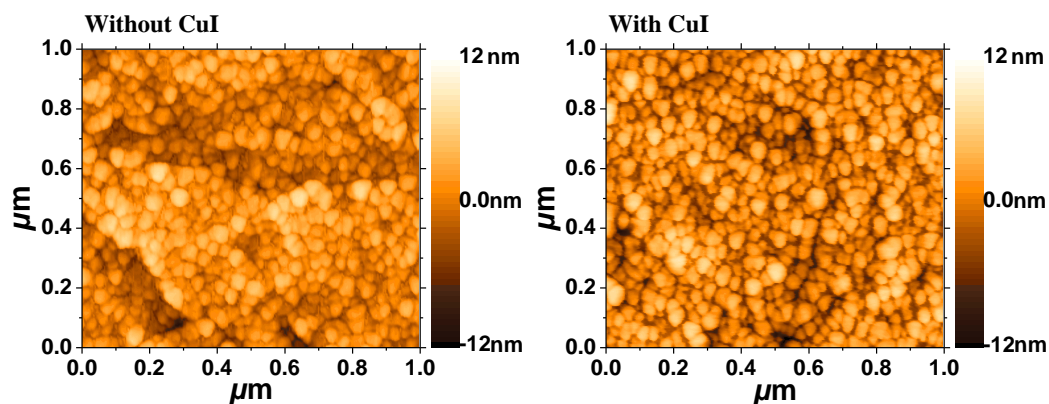

Figure S4. AFM images of the 50 nm thick 5% TAPC doped  $C_{70}$  film grown on ITO/ $ReO_3$ (1 nm) and ITO/ $ReO_3$ (1 nm)/CuI(1 nm). The size of image is  $1\ \mu m \times 1\ \mu m$ .

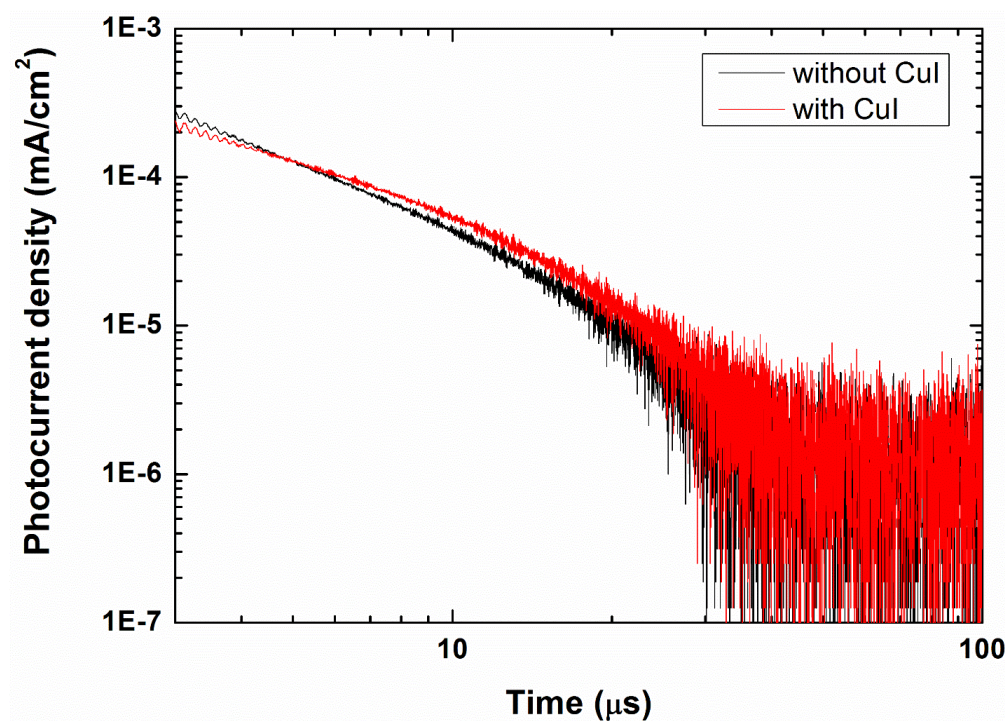

Figure S5. Transient photocurrent profiles measured at 298 K and for an electric field of  $2 \times 10^5$  V/cm. The device structures are: ITO (150 nm)/ with or without CuI (1 nm)/5% TAPC doped  $C_{70}$  (1000 nm)/Al (100 nm). The electron mobility increases with the introduction of CuI layer from  $3.35 \times 10^{-5} \text{ cm}^2/\text{Vs}$  to  $5.29 \times 10^{-5} \text{ cm}^2/\text{Vs}$ .
